# Supplementary material
Source: PubMed Central journal article supplement (PMC6348438)
Supplement: jnm194282SupplementalData.pdf [file jnm194282SupplementalData.pdf]

| <b>Group</b> | <b>Age at PET scan</b> | <b>CSF A<math>\beta</math></b> | <b>CSF Total Tau</b> | <b>CSF Total Tau:A<math>\beta</math></b> | <b>Composite Memory z-score</b> | <b>Composite Visuospatial z-score</b> | <b>Composite Language z-score</b> |
|--------------|------------------------|--------------------------------|----------------------|------------------------------------------|---------------------------------|---------------------------------------|-----------------------------------|
| <b>EOAD</b>  | 62                     | 115                            | 23                   | 0.2                                      | -2.6                            | -4.3                                  | -1.6                              |
| <b>EOAD</b>  | 60                     | 128                            | 187                  | 1.45                                     | -1.5                            | -1.6                                  | 0.17                              |
| <b>EOAD</b>  | 69                     | NA                             | NA                   | NA                                       | -0.91                           | -1.4                                  | -0.43                             |
| <b>EOAD</b>  | 53                     | 113                            | 40                   | 0.35                                     | -1.3                            | -1.0                                  | -0.62                             |
| <b>EOAD</b>  | 63                     | NA                             | NA                   | NA                                       | -1.1                            | -2.0                                  | -0.050                            |
| <b>EOAD</b>  | 51                     | 228                            | 240                  | 1.05                                     | -1.3                            | -2.4                                  | -1.7                              |
| <b>lvPPA</b> | 63                     | 152                            | 61                   | 0.4                                      | 4.0                             | -0.60                                 | -1.4                              |
| <b>lvPPA</b> | 64                     | 172                            | 271                  | 1.57                                     | 3.6                             | 1.2                                   | -1.6                              |
| <b>lvPPA</b> | 69                     | 118                            | 190                  | 1.61                                     | 0.85                            | 0.097                                 | -1.2                              |
| <b>lvPPA</b> | 55                     | 152                            | 69                   | 0.45                                     | 2.6                             | 0.39                                  | -1.2                              |
| <b>PCA</b>   | 58                     | 204                            | 89                   | 0.44                                     | -2.2                            | -3.8                                  | -2.3                              |
| <b>PCA</b>   | 59                     | 104                            | 109                  | 1.05                                     | 0.73                            | -1.9                                  | -0.13                             |
| <b>PCA</b>   | 55                     | 149                            | 102                  | 0.69                                     | 2.0                             | -2.0                                  | -1.0                              |
| <b>PCA</b>   | 58                     | 66                             | 31                   | 0.47                                     | 0.47                            | -0.82                                 | -0.73                             |
| <b>PCA</b>   | 57                     | 183                            | 98                   | 0.53                                     | 0.59                            | -4.4                                  | 0.49                              |

Supplemental Table 1: Luminex CSF measurements and composite cognitive test scores by subject. CSF samples were obtained 1-39 months prior to <sup>18</sup>F-flortaucipir PET. A $\beta$ =  $\beta$ -amyloid.

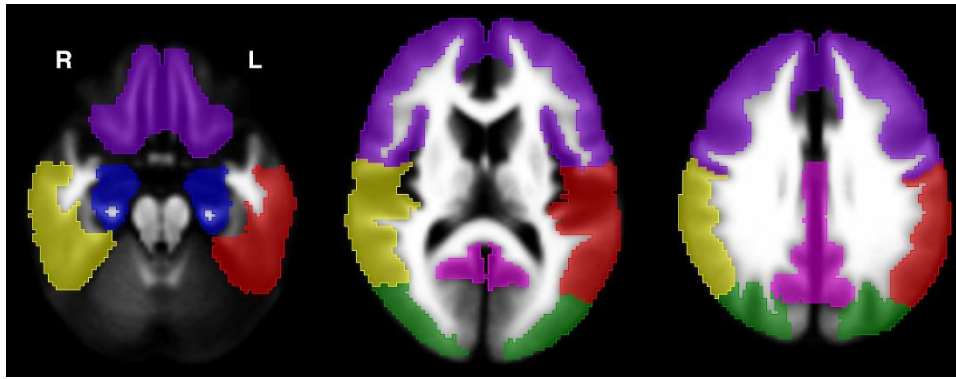

Supplemental Figure 1: Illustrations showing eight pre-defined AD subtype-specific ROIs generated from the Hammers N30R83 atlas encompassing regions predicted to show varying neurodegeneration between atypical AD syndromes, shown in template space. Right and left ROI were defined for the lateral temporoparietal region (yellow, red). Combined bilateral ROI were defined for the medial parietal/posterior cingulate (pink), frontal lobes (purple), occipital lobe (green), and medial temporal lobes (blue).

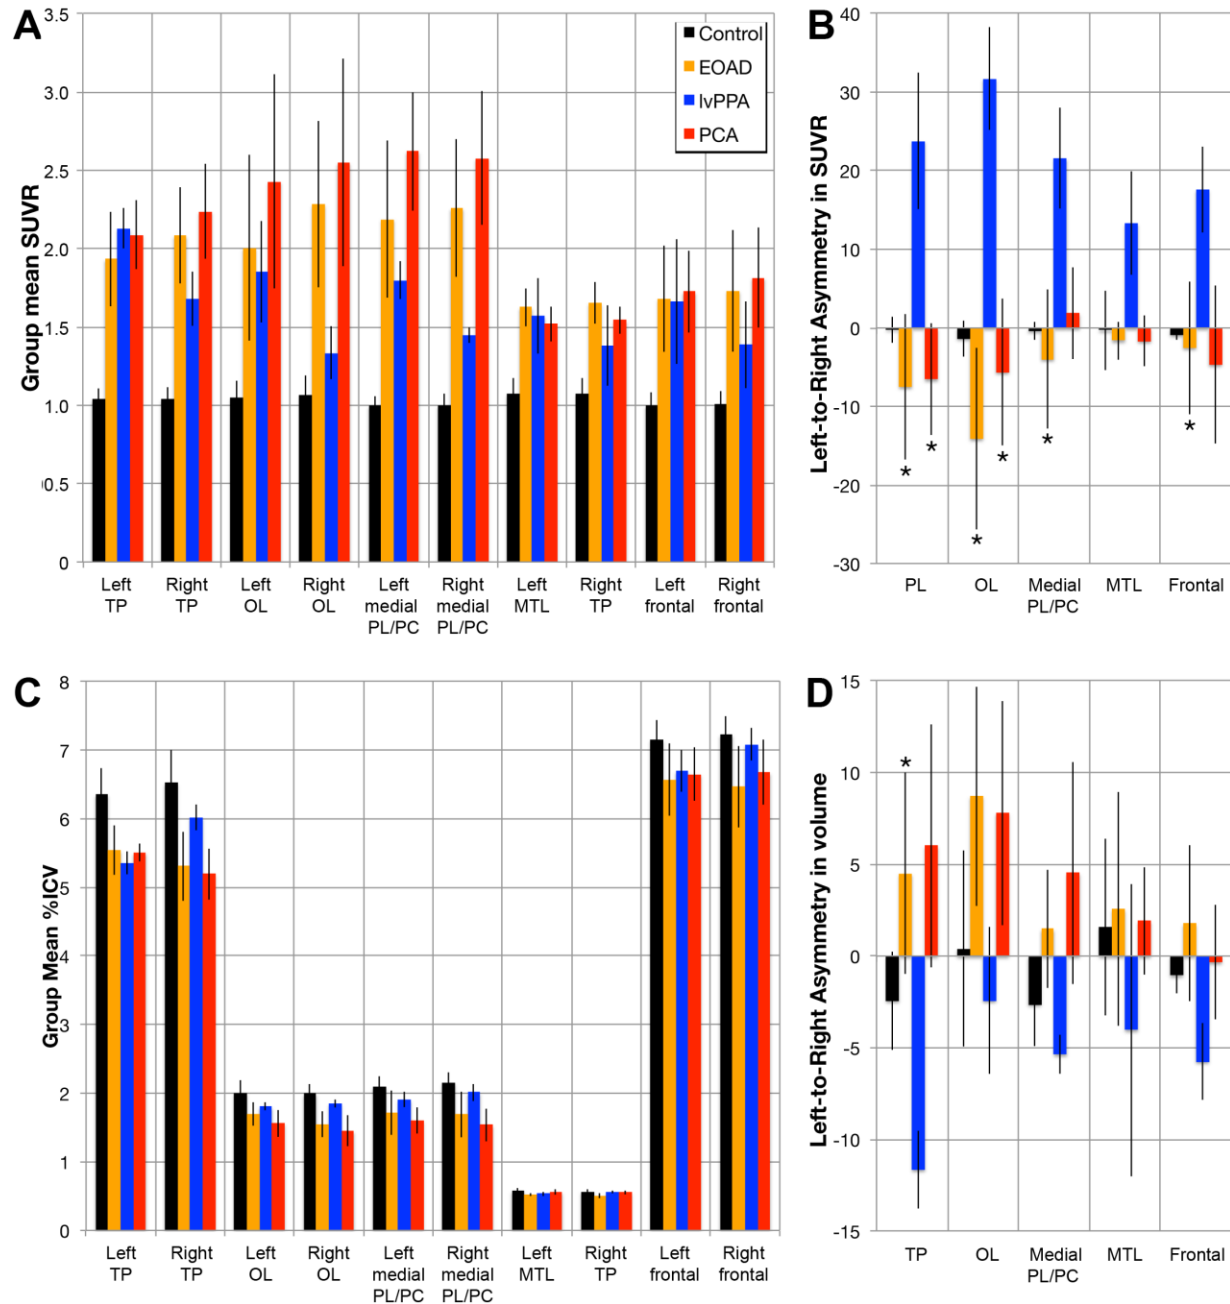

Supplemental Figure 2: Comparison of uncombined left and right ROIs. SUVR shows expected trends, with left greater than right asymmetry in IvPPA and high posterior uptake in PCA (A). Findings are not statistically significant using strict Bonferroni correction in this post-hoc analysis. Asymmetry index shows significant differences in left lateralization in IvPPA compared to AD in most ROI and compared to PCA in parietal and occipital lobes for  $^{18}\text{F}$ -flortaucipir.

Similar comparisons of MRI (C) show lower effect sizes and only one statistically significant difference in asymmetry (D). TP= temporoparietal, OL= occipital lobe, PL/PC= parietal lobe/posterior cingulate, MTL= medial temporal lobe. \* $p_{\text{corr}} < 0.05$  compared to lvPPA.
